# Supplementary material for: Cyclization of substitued 2-(2-fluorophenylazo)azines to azino[1,2-c]benzo[d][1,2,4]triazinium derivatives
Source: publisher site journal article supplement (doi:10.3762/bjoc.9.219), 2013-09-16
Supplement: Additional file 1 [file 1860-5397-9-219-S1.pdf]

# Cyclization of substituted 2-(2-fluorophenylazo)azines to azino[1,2-*c*]benzo[*d*][1,2,4]triazinium derivatives

Aleksandra Jankowiak<sup>1, a</sup>, Emilia Obijalska<sup>1, a §</sup> and Piotr Kaszynski<sup>\*1,2</sup>

Address: <sup>1</sup>Organic Materials Research Group, Department of Chemistry, Vanderbilt University, Nashville, TN 37235 USA and <sup>2</sup>Faculty of Chemistry, University of Łódź, Tamka 12, 91403 Łódź, Poland

Email: Piotr Kaszynski - piotr.kaszynski@vanderbilt.edu

\* Corresponding author

§A visiting student from the laboratory of Professor Grzegorz Mlostoń, Univeristy of Łódź, Poland.

## General methods and synthetic procedures

### Table of Content:

|                                                      |        |
|------------------------------------------------------|--------|
| 1. Additional synthetic procedures                   | ....S2 |
| 2. <sup>1</sup> H NMR spectra for selected compounds | ....S3 |
| 3. Selected interatomic distances                    | ....S5 |
| 4. Archive data for selected DFT calculations        | ....S5 |
| 5. References                                        | ....S8 |

## 1. Additional synthetic procedures

**3-Amino-4-fluorobenzoic acid** [1]. Following a literature procedure [2], 4-fluoro-3-nitrobenzoic acid (1.0 g, 5.4 mmol) was reduced with hydrogen in the presence of Pd/C (60 mg, 10% on charcoal) in EtOH (10 ml) over 24 h. The reaction mixture was passed through Celite, the filtrate was evaporated, and the residue was purified on a silica gel plug (EtOAc) to give 0.75 g (90% yield) of 3-amino-4-fluorobenzoic acid as a white solid:  $^1\text{H}$  NMR (300 MHz,  $\text{CD}_3\text{CN}$ )  $\delta$  4.40 (bs, 1H), 7.05 (dd,  $J_1 = 10.8$  Hz,  $J_2 = 8.6$  Hz, 1H), 7.26–7.35 (m, 1H), 7.46 (dd,  $J_1 = 8.8$  Hz,  $J_2 = 1.7$  Hz, 1H).

**3-Amino-4-fluorobenzyl alcohol (9e)** [3]. Following literature procedure [3] a solution of 3-amino-4-fluorobenzoic acid (4.0 g, 26.3 mmol) in dry THF (20 ml) was treated with 1 M solution of  $\text{BH}_3$  in THF (53 mmol, 53 mL) at 0 °C. The reaction mixture was stirred at rt for 24 h, MeOH (10 mL) was slowly added, and stirred for 15 min, the solvents were evaporated, and the residue was purified on a silica gel plug ( $\text{CH}_2\text{Cl}_2/\text{EtOAc}$ , 1:1) to give 3.47 g (94% yield) of alcohol **9e** as a white solid: mp 68–70 °C;  $^1\text{H}$  NMR (300 MHz,  $\text{CDCl}_3$ )  $\delta$  3.74 (bs, 2H), 4.56 (s, 2H), 6.62–6.70 (m, 1H), 6.79 (d,  $J = 8.6$  Hz, 1H), 6.95 (dd,  $J_1 = 10.7$  Hz,  $J_2 = 8.4$  Hz, 1H).

## 2. <sup>1</sup>H NMR Spectra for selected compounds.

a) recrystallized tosylate of **1b** in CD<sub>3</sub>CN.

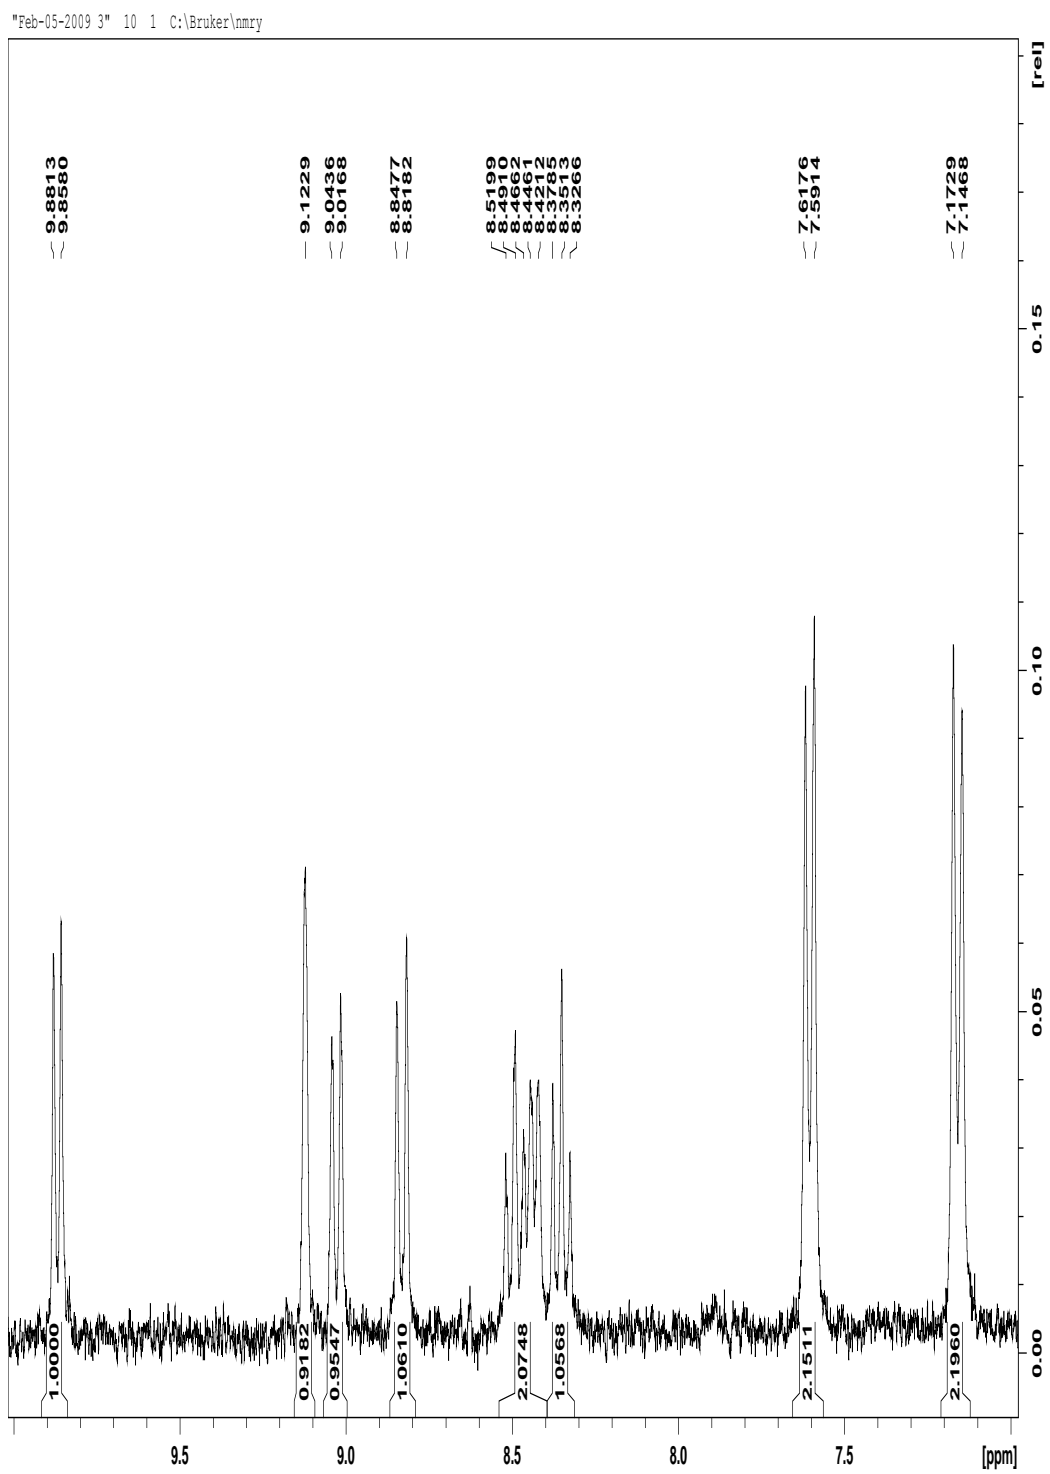

b) Crude reaction mixture of **4d** in the presence of CaCl<sub>2</sub> in CD<sub>3</sub>CN.

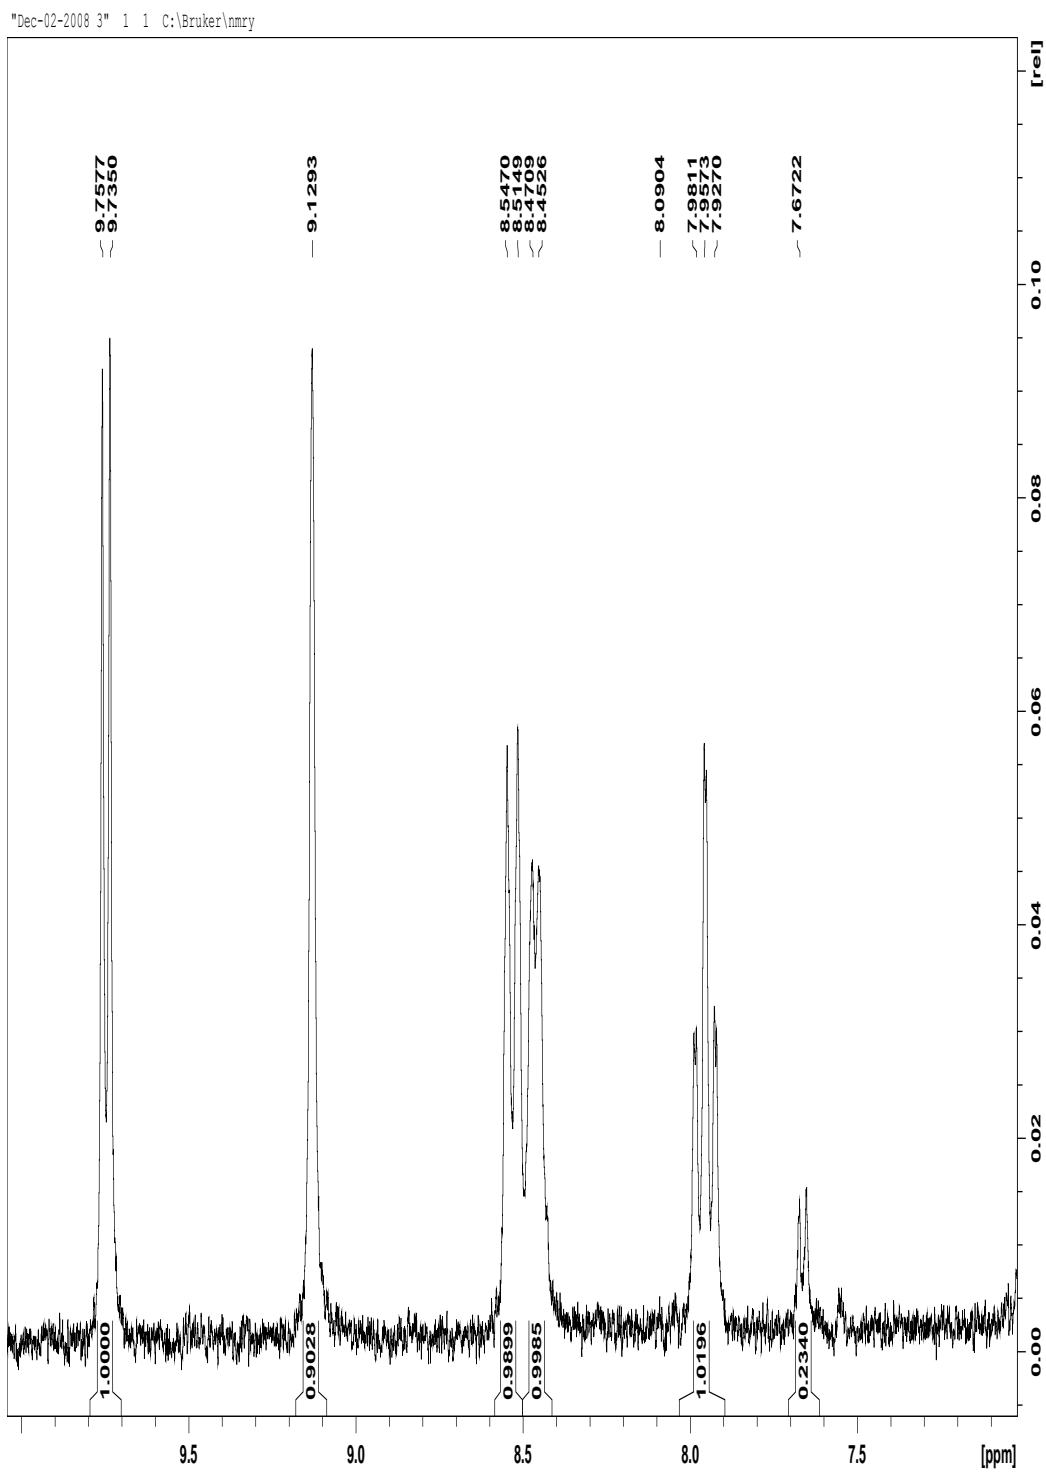

### 3. Selected interatomic distances

**Table S1:** Selected interatomic distances (Å) for species involved in the formation of triazinium from azoazines.<sup>a</sup>

|               | Azopyridines |   |   |     | <i>cis</i> -azoazine |                  | TS    |                  | cycloadduct |       |
|---------------|--------------|---|---|-----|----------------------|------------------|-------|------------------|-------------|-------|
|               | R            | X | Y | Z   | C–F                  | C <sup>⋯</sup> N | C–F   | C <sup>⋯</sup> N | C–F         | C–N   |
| <b>a</b>      | H            | H | H | H   | 1.351                | 3.151            | 1.375 | 1.916            | 1.446       | 1.458 |
| <b>b</b>      | Me           | H | H | H   | 1.351                | 3.149            | 1.375 | 1.918            | 1.448       | 1.457 |
| <b>c</b>      | Me           | F | H | H   | 1.347                | 3.101            | 1.373 | 1.928            | 1.447       | 1.459 |
| <b>d</b>      | Me           | F | F | H   | 1.346                | 3.160            | 1.371 | 1.930            | 1.445       | 1.461 |
| <b>f</b>      | CN           | H | H | H   | 1.351                | 3.166            | 1.371 | 1.917            | 1.439       | 1.456 |
| <b>g</b>      | OMe          | H | H | H   | 1.351                | 3.146            | 1.376 | 1.922            | 1.449       | 1.457 |
| <b>h</b>      | Me           | H | H | OMe | 1.353                | 3.158            | 1.379 | 1.900            | 1.452       | 1.449 |
| <b>i</b>      | Me           | H | H | CN  | 1.345                | 3.116            | 1.370 | 1.927            | 1.441       | 1.462 |
| azopyrazine   |              |   |   |     | 1.351                | 3.161            | 1.372 | 1.910            | 1.441       | 1.453 |
| azopyrimidine |              |   |   |     | 1.349                | 3.218            | 1.373 | 1.914            | 1.438       | 1.456 |

<sup>a</sup> B3LYP/6-311G(2d,p) level calculations.

### 4. Archive for selected DFT calculations.

#### 1c

```
1\1\GINC-OCTOPUS\FOpt\RB3LYP\6-311G(2d,p)\C12H9F1N3(1+)\PIOTR\29-Apr-2013\0\#\P B3LYP/6-311G(2d,p) FOpt(tight) fcheck Geom(nodistance, noangle) #P freq(noraman, ReadIso)\9-F benzotriazinium-4-Me cation, Cs\1,1\C,0.0178059915,0.,0.0073685734\C,0.0040713352,0.,1.4073209964\C,1.204966345,0.,2.0700132519\C,2.413821106,0.,1.3474791116\C,2.3893500442,0.,-0.0632379945\C,1.1780623753,0.,-0.7457583291\N,3.5803328104,0.,2.0718785321\N,4.7065649147,0.,1.4737055774\C,4.7716483938,0.,0.0999063993\C,6.0408565658,0.,-0.4825917856\C,6.2075262131,0.,-1.8529218683\C,5.0299434563,0.,-2.6361893706\C,3.7958427135,0.,-2.0605081187\N,3.6485238842,0.,-0.6977475948\C,7.5563234026,0.,-2.4989935062\F,-1.1396684945,0.,-0.6370054562\H,1.2652785747,0.,3.1504486635\H,-0.9443994001,0.,1.9277226719\H,1.0835274257,0.,-1.8210387895\H,6.877220449,0.,0.2035758035\H,5.0895126131,0.,-3.7170028497\H,2.8926399188,0.,-2.6467141489\H,7.671482959,0.8784703673,-3.1396793226\H,8.3574864436,0.,-1.7625321239\H,7.671482959,-0.8784703673,-3.1396793226\Version=EM64L-G09RevC.01\State=1-A'\HF=-726.7202058\RMSD=5.201e-09\RMSF=5.100e-06\Dipole=0.7574631,0.,-1.69817\Quadrupole=15.198246,-15.8407133,0.6424672,0.,-17.2322961,
```

0.\PG=CS [SG(C12H7F1N3),X(H2)]\

#### 4c-Z

1\1\GINC-OCTOPUS\FOpt\RB3LYP\6-311G(2d,p)\C12H9F2N3\PIOTR\29-Apr-2013\  
0\#\#P B3LYP/6-311G(2d,p) FOpt(tight) fcheck Geom(nodistance, noangle)  
#P freq(noraman, ReadIso)\2,4-F2 azopyridine-4-Me cis, C1\0,1\C,-0.0  
061411562,-0.0000713278,0.0462928849\C,-0.0151048614,-0.1225055246,1.4  
261272362\C,1.1988148844,-0.1346708017,2.0940043743\C,2.4075272993,0.0  
351879764,1.4163129272\C,2.3583792644,0.1328791056,0.025945836\C,1.168  
9827465,0.1126882611,-0.6769437292\N,3.6041758817,-0.1322454407,2.1829  
299587\N,4.6143205451,0.5821480854,2.0855604206\C,4.661321178,1.800472  
6574,1.3346174794\C,5.8777883923,2.0992033972,0.723716429\C,6.01533624  
15,3.3029440582,0.0444275763\C,4.9213729183,4.1717936506,0.0702746209\  
C,3.7687448473,3.7990658064,0.7479965418\N,3.6209323194,2.6274439319,1  
.3674885553\C,7.2828059833,3.6590486179,-0.6839390607\F,3.5065620503,0  
.225551025,-0.6724427806\F,-1.1738726135,-0.010532899,-0.6229832234\H,  
1.2357866506,-0.2646807008,3.1680701448\H,-0.9549047369,-0.2270911053,  
1.9510959522\H,1.1629288106,0.1839643557,-1.7558176618\H,6.6887679206,  
1.3847870909,0.7900381145\H,4.9707092106,5.1378831061,-0.4185254292\H,  
2.921390921,4.4761256277,0.8005297263\H,7.5436021739,4.7085525581,-0.5  
345450706\H,7.1637630756,3.5030734177,-1.7601736345\H,8.1199230532,3.0  
449060706,-0.3507131882\Version=EM64L-G09RevC.01\State=1-A\HF=-826.79  
60375\RMSD=1.228e-09\RMSF=1.657e-06\Dipole=0.4029946,0.9981221,-0.7190  
948\Quadrupole=2.5565968,0.4933782,-3.049975,5.1994276,-6.6732992,-1.6  
237568\PG=C01 [X(C12H9F2N3)]\

#### 10c-TS

1\1\GINC-OCTOPUS\FTS\RB3LYP\6-311G(2d,p)\C12H9F2N3\PIOTR\29-Apr-2013\  
\#\#P B3LYP/6-311G(2d,p) FOpt(QST3) fcheck Geom(nodistance, noangle) #P  
freq(noraman, ReadIso)\2,4-F2 azopyridine-4-Me cis, C1\0,1\C,0.0175  
479482,-0.0055450549,0.0162540436\C,-0.0007866297,-0.0284516267,1.4176  
455102\C,1.2119732447,-0.029317196,2.0672326776\C,2.423429207,0.044320  
9145,1.3596510903\C,2.4071275507,-0.0272087887,-0.0738519271\C,1.16153  
45632,-0.02567105,-0.741137217\N,3.566644133,0.255251875,2.0949292732\  
N,4.5712115923,0.9115983451,1.6472178733\C,4.465384116,1.6784411892,0.  
4801350946\C,5.3598382487,2.7548911018,0.371128799\C,5.2410374783,3.66  
55521,-0.6625471508\C,4.1863821884,3.4813489219,-1.575035365\C,3.34174  
27089,2.4042090164,-1.4238983039\N,3.50764372,1.5118217566,-0.44458542  
07\C,6.1850433654,4.8277474223,-0.8057307001\F,3.3680951853,-0.8215458  
571,-0.6476657545\F,-1.1648229317,-0.022847946,-0.6248716594\H,1.27533  
40972,-0.0192051076,3.1485102334\H,-0.945321749,-0.0395039712,1.942240  
795\H,1.113485354,-0.1279382912,-1.8164118453\H,6.1129501832,2.8556499  
702,1.1415869528\H,4.0482659439,4.1598396687,-2.4079196373\H,2.5233211  
648,2.2118317374,-2.1102709246\H,6.6514862699,4.8295552919,-1.79413620  
1\H,6.9745812183,4.7951515811,-0.055445933\H,5.6529508292,5.7767639973  
, -0.6986203033\Version=EM64L-G09RevC.01\State=1-A\HF=-826.7629384\RMS  
D=8.270e-09\RMSF=5.049e-06\Dipole=0.2601165,1.7660398,-1.0927513\Quadr  
upole=-0.9755418,1.8275899,-0.8520481,6.8702175,-5.6121195,-2.678175\PG  
G=C01 [X(C12H9F2N3)]\

#### 10c

1\1\GINC-OCTOPUS\FOpt\RB3LYP\6-311G(2d,p)\C12H9F2N3\PIOTR\29-Apr-2013\  
0\#\#P B3LYP/6-311G(2d,p) FOpt(tight) fcheck Geom(nodistance, noangle)  
#P freq(noraman, ReadIso)\9-F benzotriazinium-4-Me adduct, C1\0,1\C,  
0.0219240382,0.0036762265,0.016301023\C,0.0062378724,-0.0083300212,1.4  
498524641\C,1.1896293728,-0.0085518562,2.1027821268\C,2.4282382739,0.0

202680247, 1.3879951218\C, 2.4452218842, -0.1921550077, -0.0952999012\C, 1.1258852754, -0.0259877125, -0.7456582654\N, 3.5327880722, 0.2258378332, 2.0662551288\N, 4.6904310554, 0.4586211501, 1.4463797044\C, 4.6660138442, 0.7386029897, 0.1444798462\C, 5.8359450074, 1.2777220183, -0.4575649663\C, 5.8555151065, 1.7066712896, -1.7508870016\C, 4.6462433684, 1.5983340145, -2.502965983\C, 3.5409479242, 1.0547723217, -1.9443653852\N, 3.5345470181, 0.6071663385, -0.646183202\C, 7.0825365836, 2.2932222391, -2.3866165587\F, 2.8763967042, -1.5527794146, -0.3306071294\F, -1.1839001729, 0.0431696038, -0.582086308\H, 1.2539836204, 0.0218658623, 3.1827507514\H, -0.947494007, 0.0059217725, 1.958856555\H, 1.0265952107, -0.0976539711, -1.8183756033\H, 6.6984360581, 1.3535144862, 0.1909197882\H, 4.601800701, 1.9361960079, -3.5297853206\H, 2.6169114183, 0.947687472, -2.4870387752\H, 7.3698906297, 1.7209438678, -3.2732046225\H, 7.9254359698, 2.3019472489, -1.6963563599\H, 6.8970371709, 3.3199462158, -2.7146671274\\Version=EM64L-G09RevC.01\State=1-A\HF=-826.7891616\RMSD=8.905e-09\RMSF=1.260e-06\Dipole=0.3715638, 1.1147974, -1.6839645\Quadrupole=3.0476271, -4.3169545, 1.2693273, 3.8610542, -9.5900973, -3.0229138\PG=C01 [X(C12H9F2N3)]\\

### 13-Z

1\1\GINC-OCTOPUS\FOpt\RB3LYP\6-311G(2d,p)\C14H12F1N1\PIOTR\23-Jun-2013  
0\#\#P B3LYP/6-311G(2d,p) FOpt(tight) fcheck Geom(nodistance, noangle)  
#P freq(noraman, ReadIso)\2-F-phenyl-CHCH-pyridine-4-Me cis\0,1\C, -3.5098202455, 1.7253921278, 0.638245091\C, -3.7913660006, 0.3640736688, 0.6778609175\C, -2.9055232292, -0.539950937, 0.109454089\C, -1.7058945326, -0.1272006541, -0.4860752454\C, -1.4747000812, 1.2482909699, -0.5245989844\C, -2.3462300774, 2.1714207271, 0.0240331849\C, -0.827292743, -1.1276844441, -1.1125525095\C, 0.5049244345, -1.2770059441, -1.0739346691\C, 1.5187231755, -0.5454840488, -0.3056475558\C, 2.8695566878, -0.7166935118, -0.6351498772\C, 3.860623207, -0.0570366766, 0.082937339\C, 3.4418935651, 0.7506690601, 1.138563693\C, 2.0826571944, 0.8544116906, 1.4107953682\N, 1.1349422105, 0.2310046643, 0.7197899629\C, 5.3168581426, -0.1938760861, -0.2742752726\F, -0.3811005093, 1.7182234135, -1.1543238471\H, -4.1971157905, 2.4412438603, 1.0725627515\H, -3.1287250461, -1.6007127145, 0.1357874943\H, -2.1027201648, 3.2238448461, -0.0455912282\H, 3.1388068248, -1.3675607013, -1.4599878499\H, 4.1603109832, 1.2871021415, 1.7479566738\H, 1.7406954984, 1.470893089, 2.2379268097\H, 5.6429153151, 0.6462700358, -0.8948362307\H, 5.5056304966, -1.1102505842, -0.8353441093\H, 5.9452207696, -0.2016736017, 0.6183128806\H, -1.36763389, -1.8742185851, -1.689563598\H, 0.9099216451, -2.0869185207, -1.6738974554\H, -4.7011258399, 0.0078997152, 1.1452391773\\Version=EM64L-G09RevC.01\State=1-A\HF=-695.4860054\RMSD=7.353e-09\RMSF=6.996e-07\Dipole=0.5607088, -0.212017, 0.0432391\Quadrupole=7.2460054, -1.5827996, -5.6632058, -0.4110655, -1.4895755, 4.4245951\PG=C01 [X(C14H12F1N1)]\@

### 13-Z TS

1\1\GINC-OCTOPUS\FTS\RB3LYP\6-311G(2d,p)\C14H12F1N1\PIOTR\24-Jun-2013  
0\#\#P B3LYP/6-311G(2d,p) FOpt(QST3) fcheck Geom(nodistance, noangle) #  
P freq(noraman, ReadIso)\2-F-phenyl-CHCH-pyridine-4-Me cis\0,1\C, -2.7754206201, 1.4607082771, 1.0928189764\C, -3.4193723167, 0.3351911971, 0.5465818116\C, -2.8368517693, -0.3034452605, -0.5263764964\C, -1.6121235657, 0.1219140249, -1.0680610692\C, -0.9917846599, 1.3147113226, -0.5499216649\C, -1.6052128327, 1.953781518, 0.5677575795\C, -0.8871578525, -0.6639902786, -2.0125822161\C, 0.4735175604, -0.7001968834, -2.0698410565\C, 1.2935226678, -0.1053106674, -1.0525963977\C, 2.6170416299, -0.5333175945, -0.8206421517\C, 3.3534970961, -0.0496586794, 0.2413580255\C, 2.7272723578, 0.8680913513, 1.1068588986\C, 1.4324439339, 1.2506061613, 0.8509672317\N, 0.7557011276, 0.8108705589, -0.2128587565\C, 4.7675765601, -0.4957752419, 0.493607926\

F, -0.5485131499, 2.2125831954, -1.5220872716\H, -3.2349469917, 1.985571544, 1.9236305366\H, -3.3015004202, -1.1858301207, -0.9553102702\H, -1.1813309186, 2.8849878683, 0.9225956177\H, 3.0399155107, -1.2767219686, -1.4861089233\H, 3.25615174, 1.2863807729, 1.9541050126\H, 0.8999412442, 1.9462418104, 1.4903942758\H, 5.4465971996, 0.3607760573, 0.5149699569\H, 5.1137505084, -1.1854255769, -0.2763257752\H, 4.8521395057, -0.9970258998, 1.4616011999\H, -1.4496595322, -1.3472452563, -2.6427520223\H, 0.9688672039, -1.3637877877, -2.7667538959\H, -4.3525622166, -0.0188054441, 0.9640269187\Version=EM64L-G09RevC.01\State=1-A\HF=-695.4456893\RMSD=4.310e-09\RMSF=1.464e-05\Dipole=1.3886805, -0.6556405, 0.6464334\Quadrupole=4.3771447, -2.7606909, -1.6164538, 0.2111741, 0.8234512, 6.399751\PG=C01 [X(C14H12F1N1)]\@

### 13-Z-cycloadduct

1\1\GINC-OCTOPUS\FTS\RB3LYP\6-311G(2d,p)\C14H12F1N1\PIOTR\24-Jun-2013\0\#\#P B3LYP/6-311G(2d,p) FOpt(QST3) fcheck Geom(nodistance, noangle) # P freq(noraman, ReadIso)\2-F-phenyl-CHCH-pyridine-4-Me cis\0,1\C, -2.7754206201, 1.4607082771, 1.0928189764\C, -3.4193723167, 0.3351911971, 0.5465818116\C, -2.8368517693, -0.3034452605, -0.5263764964\C, -1.6121235657, 0.1219140249, -1.0680610692\C, -0.9917846599, 1.3147113226, -0.5499216649\C, -1.6052128327, 1.953781518, 0.5677575795\C, -0.8871578525, -0.6639902786, -2.0125822161\C, 0.4735175604, -0.7001968834, -2.0698410565\C, 1.2935226678, -0.1053106674, -1.0525963977\C, 2.6170416299, -0.5333175945, -0.8206421517\C, 3.3534970961, -0.0496586794, 0.2413580255\C, 2.7272723578, 0.8680913513, 1.1068588986\C, 1.4324439339, 1.2506061613, 0.8509672317\N, 0.7557011276, 0.8108705589, -0.2128587565\C, 4.7675765601, -0.4957752419, 0.493607926\F, -0.5485131499, 2.2125831954, -1.5220872716\H, -3.2349469917, 1.985571544, 1.9236305366\H, -3.3015004202, -1.1858301207, -0.9553102702\H, -1.1813309186, 2.8849878683, 0.9225956177\H, 3.0399155107, -1.2767219686, -1.4861089233\H, 3.25615174, 1.2863807729, 1.9541050126\H, 0.8999412442, 1.9462418104, 1.4903942758\H, 5.4465971996, 0.3607760573, 0.5149699569\H, 5.1137505084, -1.1854255769, -0.2763257752\H, 4.8521395057, -0.9970258998, 1.4616011999\H, -1.4496595322, -1.3472452563, -2.6427520223\H, 0.9688672039, -1.3637877877, -2.7667538959\H, -4.3525622166, -0.0188054441, 0.9640269187\Version=EM64L-G09RevC.01\State=1-A\HF=-695.4456893\RMSD=4.310e-09\RMSF=1.464e-05\Dipole=1.3886805, -0.6556405, 0.6464334\Quadrupole=4.3771447, -2.7606909, -1.6164538, 0.2111741, 0.8234512, 6.399751\PG=C01 [X(C14H12F1N1)]\@

### 4. References

1. Dunker, M. F. W.; Starkey, E. B. *J. Am. Chem. Soc.* **1939**, *61*, 3005-3007.
2. May, S. W.; Phillips, R. S.; Oldham, C. D. *Biochemistry* **1978**, *17*, 1853-.
3. Carroll, W. A.; Altenbach, R. J.; Bai, H.; Brioni, J. D.; Brune, M. E.; Buckner, S. A.; Cassidy, C.; Chen, Y.; Coghlan, M. J.; Daza, A. V.; Drizin, I.; Fey, T. A.; Fitzgerald, M.; Gopalakrishnan, M.; Gregg, R. J.; Henry, R. F.; Holladay, M. W.; King, L. L.; Kort, M. E.; Kym, P. R.; Milicic, I.; Tang, R.; Turner, S. C.; Whiteaker, K. L.; Yi, L.; Zhang, H.; Sullivan, J. P. *J. Med. Chem.* **2004**, *47*, 3163-3179.
